# Supplementary material for: Performance enhancement of a p-Si/n-ZnGa2O4 heterojunction solar-blind UV photodetector through interface engineering
Source: Royal Society of Chemistry journal article supplement (doi:10.1039/d1tc01705e), 2021-01-01
Supplement: d1tc01705e1.pdf [file d1tc01705e1.pdf]

Supplementary Information

**Performance enhancement of p-Si/n-ZnGa<sub>2</sub>O<sub>4</sub>  
heterojunction solar-blind UV photodetector through  
interface engineering**

Dongyang Han,<sup>ab</sup> Kewei Liu,<sup>\*ab</sup> Jialin Yang,<sup>a</sup> Xing Chen,<sup>ab</sup> Binghui Li,<sup>a</sup> Lei Liu,<sup>ab</sup> and

Dezhen Shen<sup>\*ab</sup>

<sup>a</sup> State Key Laboratory of Luminescence and Applications, Changchun Institute of Optics, Fine Mechanics and Physics, Chinese Academy of Sciences, Changchun 130033, P.R. China

<sup>b</sup> Center of Materials Science and Optoelectronics Engineering, University of Chinese Academy of Sciences, Beijing 100049, P.R. China

Corresponding Author:

\*E-mail: liukw@ciomp.ac.cn (K.L.), \*E-mail: shendz@ciomp.ac.cn (D.S)

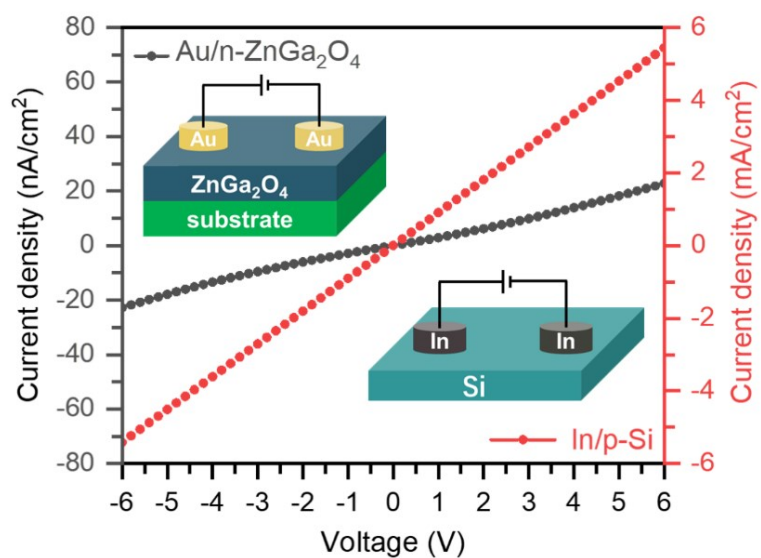

**Fig. S1**  $I$ - $V$  plots of the In metal contacts on  $p$ -Si and Au metal contacts on  $n$ - $\text{ZnGa}_2\text{O}_4$ .

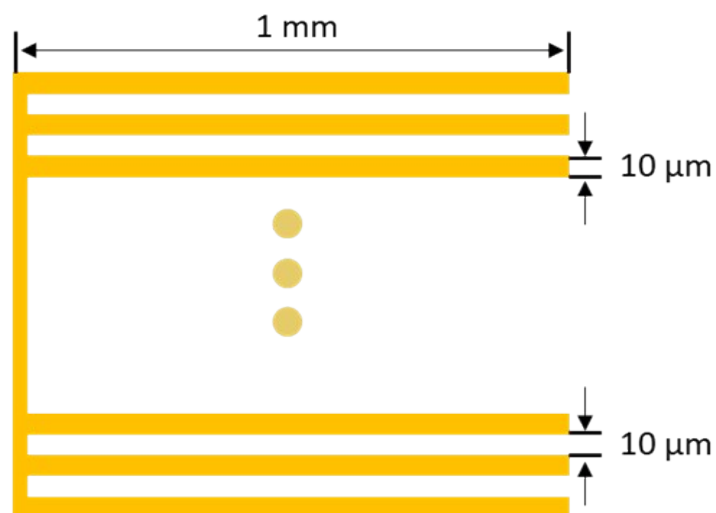

**Fig. S2** The shape of the Au electrode. The comb-shaped Au electrode has a tooth width of  $10\ \mu\text{m}$ , a length of 1 mm and a gap of  $10\ \mu\text{m}$ .

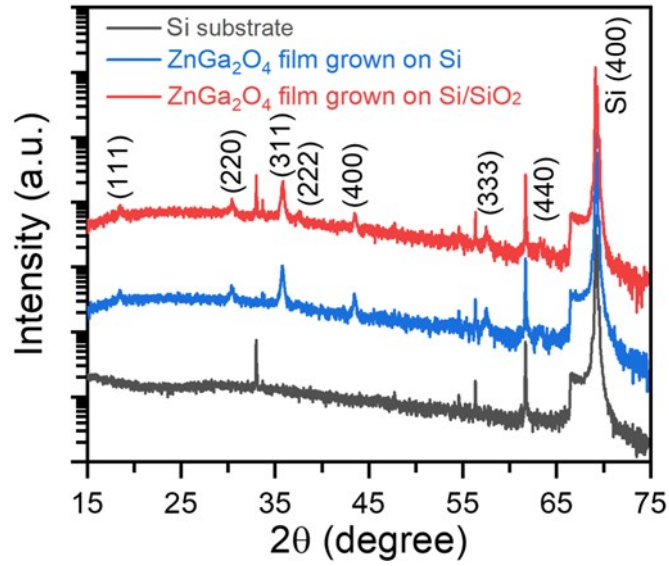

**Fig. S3** XRD patterns of Si substrate, ZnGa<sub>2</sub>O<sub>4</sub> film grown on Si and Si/SiO<sub>2</sub>.

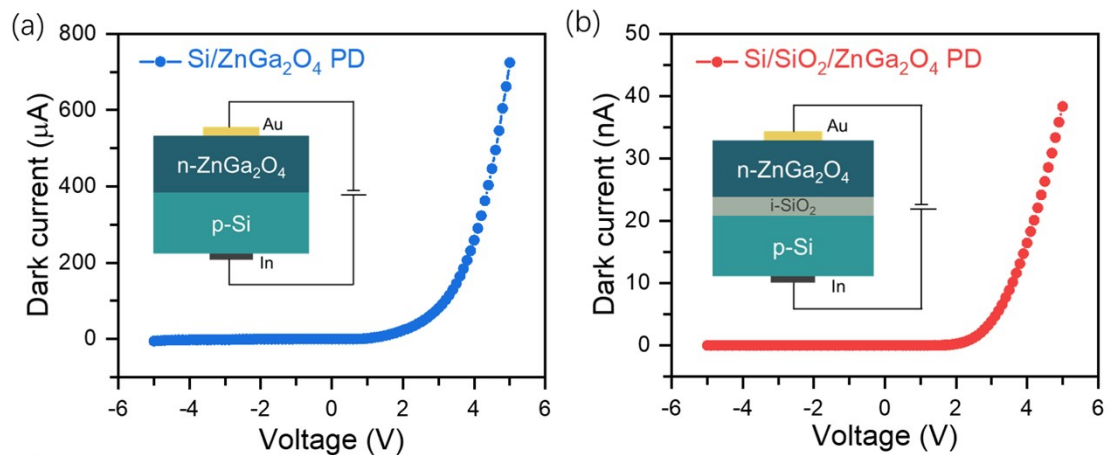

**Fig. S4**  $I$ - $V$  characteristic curves of the Si/ZnGa<sub>2</sub>O<sub>4</sub> PD (a) and Si/SiO<sub>2</sub>/ZnGa<sub>2</sub>O<sub>4</sub> PD (b) in dark under linear coordinates. The inset is the schematic diagram of the power supply connections of the device at forward bias.

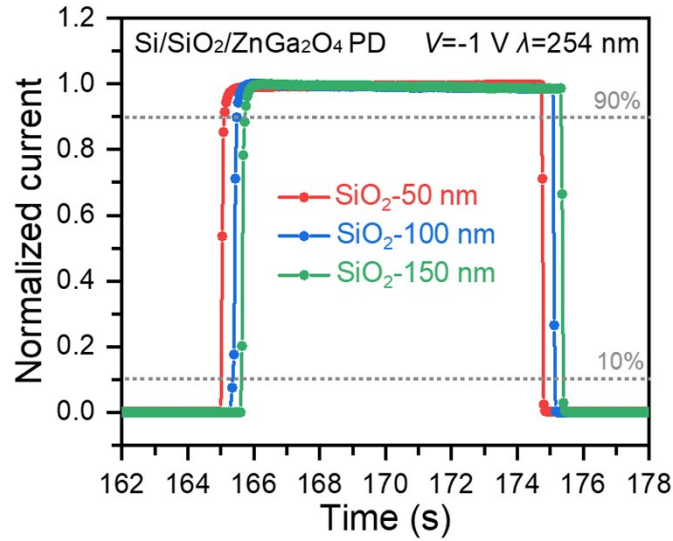

**Fig. S5** The normalized transient current photoresponse characteristics of Si/SiO<sub>2</sub>/ZnGa<sub>2</sub>O<sub>4</sub> PDs with different SiO<sub>2</sub> layer thickness (from 50 nm to 150 nm) under 254 nm illumination with 1020 μW/cm<sup>2</sup> intensity at -1 V bias.

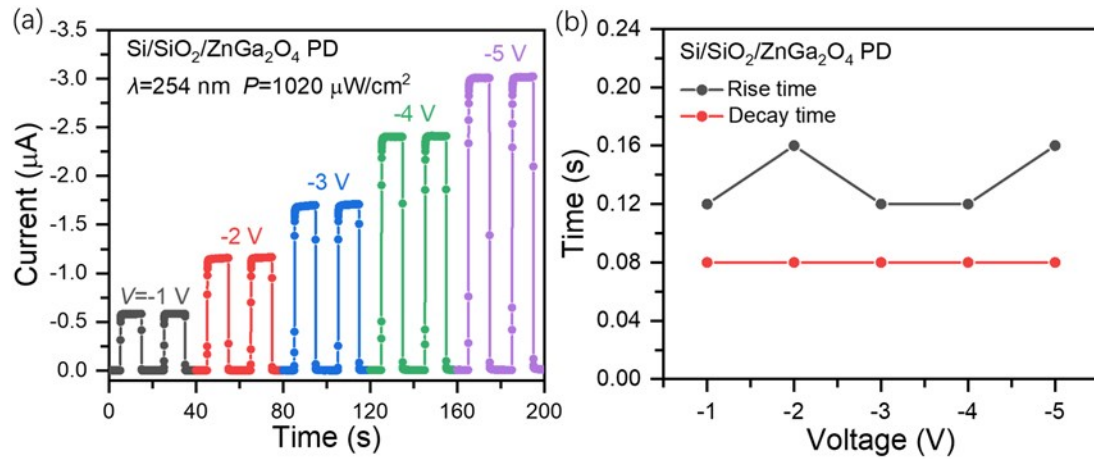

**Fig. S6** (a) Time-dependent photoresponse characteristics of Si/SiO<sub>2</sub>/ZnGa<sub>2</sub>O<sub>4</sub> PD the under 254 nm illumination with 1020 μW/cm<sup>2</sup> intensity at different bias voltages from -1 V to -5 V. (b) The rise and decay times of Si/SiO<sub>2</sub>/ZnGa<sub>2</sub>O<sub>4</sub> PD as function of bias voltage.
